# Supplementary material
Source: HighWire-hosted journal article supplement (https://erj.ersjournals.com/content/50/3/1700612)
Supplement: inline-supplementary-material-2 [file inline-supplementary-material-2.pdf]

**Table 1:** Demographics of the PCD, respiratory control and healthy participants.

|                                                                                             | PCD           | Non-PCD               |               |
|---------------------------------------------------------------------------------------------|---------------|-----------------------|---------------|
|                                                                                             |               | Respiratory Control   | Healthy       |
| Number of subjects                                                                          | 15            | 9                     | 10            |
| Male n (%)                                                                                  | 10 (66.7)     | 5 (55.6)              | 3 (30)        |
| Median age in years (IQR)                                                                   | 16.85 (19.89) | 2.9 (4.87)            | 32.55 (14.96) |
| Pulmonary symptoms n (%)                                                                    | 15 (100)      | 8 (88.9)              | 0             |
| Rhinosinusitis n (%)                                                                        | 14 (93.3)     | 7 (77.8)              | 0             |
| Situs abnormality n (%)                                                                     | 9 (60)        | 1 (11.1) <sup>Δ</sup> | 0             |
| Footnote: <sup>Δ</sup> normal diagnostic tests (see Supplementary Table 1, participant 018) |               |                       |               |

**Supplementary Table S1:** Diagnostic results for PCD and respiratory control and healthy participants.

We have indicated which experiments the participants were recruited to (NTHi isolation, co-culture (*Biofilm CFUs*, *SEM*, *FISH*, *TEER*, *Cytokines*, *LL-37*), % ciliation by beta-tubulin immunofluorescence (IF) or Fast Fourier Transform (FFT) analysis, nitric oxide synthase (NOS) isoenzyme IF, DAF-FM labelling of nitric oxide, PYRRO-CD3 treatment).

|     | PCD or Respiratory control or Healthy | Age (Years) | Situs        | nNO (nL/min) | CBF (normal range 11-20 Hz) | CBP                                                                                 | TEM defect | Genotype | Experiment(s)                                |
|-----|---------------------------------------|-------------|--------------|--------------|-----------------------------|-------------------------------------------------------------------------------------|------------|----------|----------------------------------------------|
| 001 | PCD                                   | 8           | Dextrocardia | 9.6          | 0                           | Immotile                                                                            | ODA & IDA  | ZMYND10  | NTHi isolation                               |
| 002 | PCD                                   | 15          | Heterotaxy   | 6            | 0                           | Immotile                                                                            | ODA & IDA  | DYX1C1   | NTHi isolation                               |
| 003 | PCD                                   | 10          | Normal       | 15           | N/A                         | Predominantly immotile (some residual movement)                                     | ODA        | DNAH5    | NTHi isolation                               |
| 004 | PCD                                   | 5           | Dextrocardia | 3            | 0                           | Immotile                                                                            | ODA        | DNAH5    | NTHi isolation                               |
| 005 | PCD                                   | 27.97       | Normal       | 77.4         | 8.67                        | Asynchronous stiff cilia on 2 separate occasions, also consistent after ALI-culture | Normal     | Unknown  | Co-culture, % ciliation (by beta-tubulin IF) |
| 006 | PCD                                   | 23.05       | Dextrocardia | 7.98         | N/A                         | Predominantly immotile with some stiff hyperfreq. cilia (reduced amplitude)         | Normal     | DNAH11   | Co-culture, PYRRO-C3D                        |
| 007 | PCD                                   | 14.8        | Normal       | 19.5         | 0                           | Immotile                                                                            | ODA        | DNAH5    | Co-culture, NOS isoenzymes by IF             |
| 008 | PCD                                   | 16.85       | Normal       | 25.8         | 0                           | Immotile                                                                            | ODA        | DNAH5    | Co-culture                                   |
| 009 | PCD                                   | 21.61       | Dextrocardia | 12.9         | N/A                         | Predominantly                                                                       | ODA        | DNAI1    | Co-culture                                   |

|     |                     |       |              |       |       |                                                                   |        |         |                                                        |
|-----|---------------------|-------|--------------|-------|-------|-------------------------------------------------------------------|--------|---------|--------------------------------------------------------|
|     |                     |       |              |       |       | Immotile<br>(some residual movement)                              |        |         | NOS isoenzymes by IF                                   |
| 010 | PCD                 | 47.35 | Dextrocardia | 12    | 0     | Immotile                                                          | ODA    | DNAH5   | NOS isoenzymes by IF, % ciliation (by beta-tubulin IF) |
| 011 | PCD                 | 29.70 | Normal       | 12.6  | N/A   | Predominantly stiff moving asynchronous cilia and others immotile | Normal | HYDIN   | % ciliation (by beta-tubulin IF), DAF-FM, PYRRO-C3D    |
| 012 | PCD                 | 7.51  | Dextrocardia | 3     | 0     | Immotile                                                          | ODA    | DNAH5   | % ciliation (by beta-tubulin IF), DAF-FM               |
| 013 | PCD                 | 0.50  | Dextrocardia | ND    | 0     | Immotile                                                          | ODA    | Unknown | % ciliation (by beta-tubulin IF), DAF-FM               |
| 014 | PCD                 | 27.89 | Normal       | 1.6   | N/A   | Predominantly stiff moving asynchronous cilia and others immotile | Normal | HYDIN   | PYRRO-C3D                                              |
| 015 | PCD                 | 20.45 | Dextrocardia | 7.32  | N/A   | Predominantly stiff moving asynchronous cilia and others immotile | Normal | DNAH11  | PYRRO-C3D                                              |
| 016 | Respiratory control | 46.18 | Normal       | 277.5 | 18.47 | Normal                                                            | Normal | ND      | Co-culture                                             |
| 017 | Respiratory control | 2.30  | Normal       | ND    | 12.2  | Normal                                                            | Normal | ND      | NOS isoenzymes by IF                                   |
| 018 | Respiratory control | 1.49  | Dextrocardia | ND    | 15    | Normal                                                            | ND     | ND      | NOS isoenzymes by IF                                   |
| 019 | Respiratory control | 1.80  | Normal       | ND    | 15.6  | Normal                                                            | ND     | ND      | NOS isoenzymes by IF, % ciliation (by beta-tubulin IF) |
| 020 | Respiratory control | 3.02  | Normal       | 52.8  | 15.5  | Normal                                                            | ND     | ND      | % ciliation (by beta-tubulin IF)                       |
| 021 | Respiratory control | 0.19  | Unknown      | ND    | 14.56 | Normal                                                            | Normal | ND      | % ciliation (by beta-tubulin IF)                       |
| 022 | Respiratory control | 2.91  | Normal       | ND    | 15.7  | Normal                                                            | Normal | ND      | % ciliation (by beta-tubulin IF), DAF-FM               |
| 023 | Respiratory control | 2.98  | Unknown      | ND    | 18.7  | Normal                                                            | Normal | ND      | % ciliation (by beta-tubulin IF)                       |

[illegible]
